# Supplementary material for: Interaction of Different Charged Polymers with Potassium Ions and Their Effect on the Yield Stress of Highly Concentrated Glass Bead Suspensions
Source: MDPI journal article supplement (doi:10.3390/ma13071490), 2020-03-25
Supplement: s1 [file s1]

# Interaction of Different Charged Polymers with Potassium Ions and Their Effect on the Yield Stress of Highly Concentrated Glass Bead Suspensions

Zichen Lu <sup>1,\*</sup>, Simon Becker <sup>2</sup>, Sarah Leinitz <sup>3</sup>, Wolfram Schmidt <sup>3</sup>, Regine von Klitzing <sup>2</sup>, Dietmar Stephan <sup>1,\*</sup>

<sup>1</sup> Department of Civil Engineering, Technische Universität Berlin, Berlin 13355, Germany

<sup>2</sup> Department of Physics, Technische Universität Darmstadt, 64289, Germany; becker@fkp.tu-darmstadt.de (S.B.); klitzing@smi.tu-darmstadt.de (R.v.K.)

<sup>3</sup> Bundesanstalt für Materialforschung und -prüfung (BAM), Berlin 12205, Germany; sarah.leinitz@bam.de (S.L.); Wolfram.Schmidt@bam.de (W.S.)

\* Correspondence: zichen.lu@tu-berlin.de (Z.L.); stephan@tu-berlin.de (D.S.)

Received: 16 February 2020; Accepted: 23 March 2020; Published: 23 March 2020

Figure S1 shows the pH of glass bead suspension (GBS) with the addition of different polymers under increasing  $[K^+]$ . Normally the pH of the prepared GBS was in the range of 10.1 to 11.3. However, it also depends on the concentration of salts and polymers.

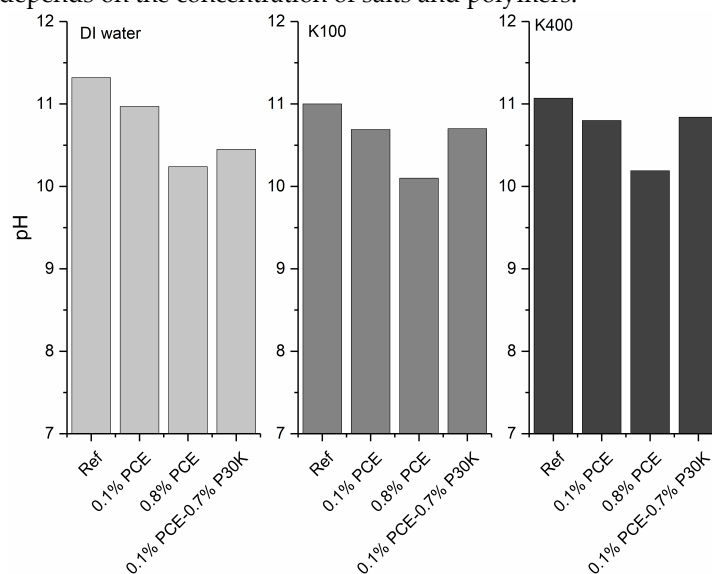

**Figure S1.** pH of GBS with the addition of different polymers under increasing  $[K^+]$ .

As shown in Figure S2, the GBS was measured rotational with a stepwise increased shear rate from  $0 \text{ s}^{-1}$  to  $8.378 \text{ s}^{-1}$ . The increase of the shear rate took place every 15 seconds. After reaching  $8.378 \text{ s}^{-1}$ , the shear rate was decreasing also stepwise in 14 steps. The total measurement time is 7 min.

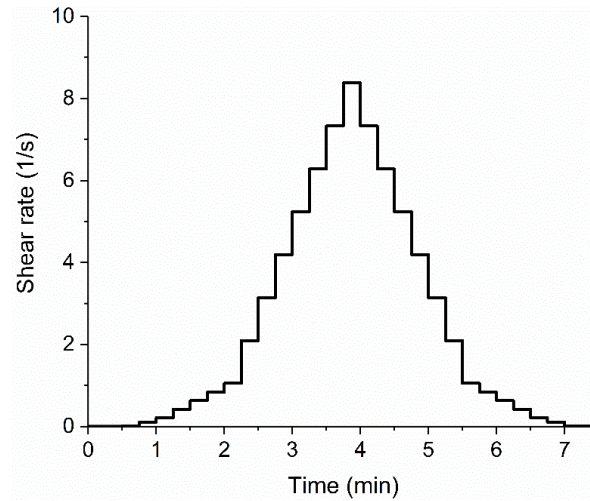

**Figure S2.** Profile of the rheological measurement.

After each measurement, a curve showing the change of shear stress along with the shear rate could be obtained. Herschel Bulkley's equation ( $\tau = \tau_0 + k\dot{\gamma}^n$ ) was used to fit the obtained curve and then the information on yield stress and viscosity of GBS could be gotten. One example of fitting and the corresponding R-square are shown in Figure S3. We can find that a good fitting was obtained.

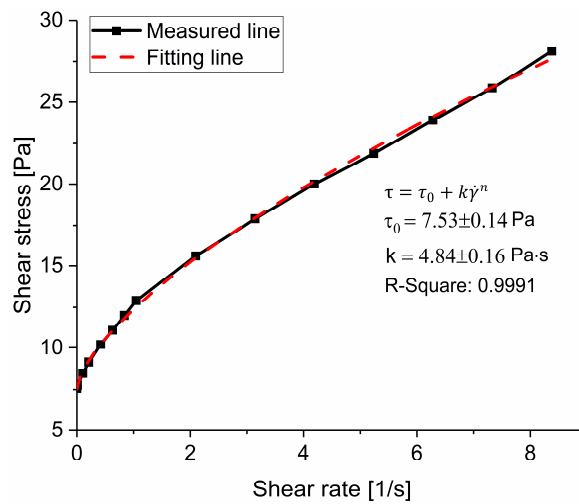

**Figure S3.** Measured shear stress vs shear rate curve and the corresponding fitting curve.

The shear stress and shear rate curve of GBS with different types of polymers under increasing  $[K^+]$  can be found in Figure S4. Each curve was fitted as the method shown in Figure S3 and then the yield stress was obtained. The results are shown in Fig. 8 in the manuscript.

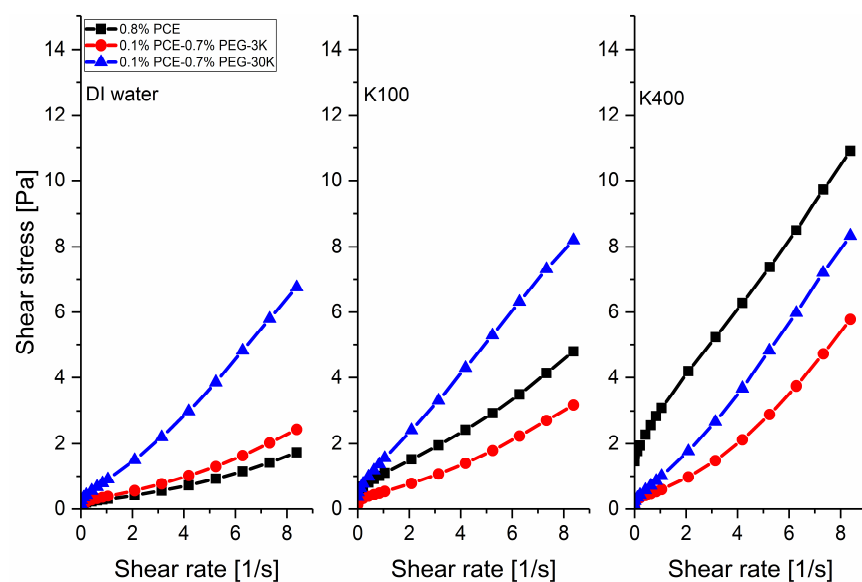

**Figure S4.** Shear stress vs shear rate curve of the samples with the addition of polymers under increasing  $[K^+]$ .

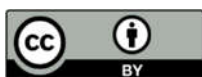

© 2020 by the authors. Submitted for possible open access publication under the terms and conditions of the Creative Commons Attribution (CC BY) license (<http://creativecommons.org/licenses/by/4.0/>).
